# Supplementary material
Source: publisher figshare collection journal article supplement (https://sage.figshare.com/ndownloader/files/14464400)
Supplement: Supplementary file 1 [file 14464400]

**Supplementary Table 1. Baseline characteristics between DWI-pc-ASPECTS >6 and ≤6**

|                                     | <b>ASPECTS&gt;6</b> | <b>ASPECTS≤6</b> | <b>P</b> |
|-------------------------------------|---------------------|------------------|----------|
|                                     | <b>(N=24)</b>       | <b>(N=45)</b>    |          |
| <b>Age, years</b>                   | 64.0 [55.5;71.5]    | 69.0 [57.0;78.0] | 0.126    |
| <b>Sex, male</b>                    | 15 (62.5%)          | 32 (71.1%)       | 0.646    |
| <b>Comorbidities</b>                | 14 (58.3%)          | 28 (62.2%)       | 0.955    |
| <b>Hypertension</b>                 | 7 (29.2%)           | 12 (26.7%)       | >0.999   |
| <b>Diabetes mellitus</b>            | 10 (41.7%)          | 12 (26.7%)       | 0.316    |
| <b>Smoking</b>                      | 7 (29.2%)           | 3 (6.7%)         | 0.030    |
| <b>Alcohol</b>                      | 10 (41.7%)          | 11 (24.4%)       | 0.228    |
| <b>Hypercholesterolemia</b>         | 7 (29.2%)           | 15 (33.3%)       | 0.700    |
| <b>Atrial fibrillation</b>          | 5 (20.8%)           | 10 (22.2%)       | >0.999   |
| <b>History of Stroke</b>            | 14 (58.3%)          | 28 (62.2%)       | 0.955    |
| <b>Cancer</b>                       | 3 (12.5%)           | 6 (13.3%)        | >0.999   |
| <b>Acute management</b>             |                     |                  |          |
| <b>Tissue plasminogen activator</b> | 7 (29.2%)           | 9 (20.0%)        | 0.576    |
| <b>Angioplasty</b>                  | 11 (45.8%)          | 22 (48.9%)       | >0.999   |
| <b>Stent</b>                        | 8 (33.3%)           | 16 (35.6%)       | >0.999   |
| <b>Location of Occlusion</b>        |                     |                  | 0.19     |
| <b>Proximal</b>                     | 10 (29.4%)          | 5 (45.5%)        |          |

|                                            |                     |                     |       |
|--------------------------------------------|---------------------|---------------------|-------|
| <b>Mid</b>                                 | 8 (23.5%)           | 0 (0.0%)            |       |
| <b>Distal</b>                              | 16 (47.1%)          | 6 (54.5%)           |       |
| <b>TOAST classification</b>                |                     |                     | 0.984 |
| <b>Large-artery atherosclerosis</b>        | 12 (50.0%)          | 24 (53.3%)          |       |
| <b>Cardioembolism</b>                      | 7 (29.2%)           | 13 (28.9%)          |       |
| <b>Stroke of other determined etiology</b> | 1 (4.2%)            | 2 (4.4%)            |       |
| <b>Stroke of undetermined etiology</b>     | 4 (16.7%)           | 6 (13.3%)           |       |
| <b>Onset to Puncture (min)</b>             | 441.0 [257.5;800.5] | 555.0 [223.0;954.0] | 0.566 |
| <b>Onset to Recanalization (min)</b>       | 478.0 [295.5;864.0] | 668.0 [346.0;994.0] | 0.477 |
| <b>Mean duration of procedure (min)</b>    | 49.5 [23.5;67.0]    | 68.0 [47.0;104.0]   | 0.022 |
| <b>Initial NIHSS</b>                       | 10.0 [7.0;17.0]     | 15.0 [10.0;24.0]    | 0.038 |
| <b>Pre-stroke mRS</b>                      |                     |                     | 0.171 |
| <b>0</b>                                   | 21 (87.5%)          | 39 (86.7%)          |       |
| <b>1</b>                                   | 3 (12.5%)           | 2 (4.4%)            |       |
| <b>2</b>                                   | 0 (0.0%)            | 4 (8.9%)            |       |

---

Values are means  $\pm$  SDs, or medians (with quartiles), as appropriate.

Abbreviations: TOAST = Trial of ORG 10172 in Acute Stroke Treatment; FAT = first abnormal time; NIHSS = National Institutes of Health Stroke Scale; mRS = modified Rankin scale

**Supplementary Table 2. Clinical and imaging outcomes in groups of patients with acute basilar artery occlusion**

|                                            | <b>ASPECTS&gt;6</b> | <b>ASPECTS≤6</b> | <b>P</b> |
|--------------------------------------------|---------------------|------------------|----------|
|                                            | <b>(N=24)</b>       | <b>(N=45)</b>    |          |
| <b>Age &gt; 70 years</b>                   | 6 (25.0%)           | 19 (42.2%)       | 0.248    |
| <b>NIHSS at discharge</b>                  | 3.5 [0.0; 6.5]      | 13.5 [3.0;29.0]  | <0.001   |
| <b>Recovery after ERT (Δ NIHSS)</b>        | 6.0 [3.5;11.0]      | 0.0 [-6.0; 6.0]  | 0.003    |
| <b>mRS≤2 at 90 days</b>                    | 17 (70.8%)          | 11 (24.4%)       | 0.001    |
| <b>Mortality at 90 days</b>                | 0 (0.0%)            | 10 (22.2%)       | 0.032    |
| <b>Length of hospital stay, days</b>       | 9.0 [6.5;14.5]      | 11.0 [7.0;15.0]  | 0.408    |
| <b>mTICI, 2b–3</b>                         | 24 (100.0%)         | 41 (91.1%)       | 0.335    |
| <b>1</b>                                   | 0 (0.0%)            | 2 (4.4%)         |          |
| <b>2a</b>                                  | 0 (0.0%)            | 2 (4.4%)         |          |
| <b>2b</b>                                  | 10 (41.7%)          | 23 (51.1%)       |          |
| <b>3</b>                                   | 14 (58.3%)          | 18 (40.0%)       |          |
| <b>Any hemorrhage on follow-up imaging</b> | 3 (12.5%)           | 18 (40.0%)       | 0.244    |
| <b>HI-1</b>                                | 2 (8.3%)            | 10 (22.2%)       |          |
| <b>HI-2</b>                                | 1 (4.3%)            | 2 (4.4%)         |          |
| <b>PH-1</b>                                | 0 (0.0%)            | 0 (0.0%)         |          |

|                                     |          |            |       |
|-------------------------------------|----------|------------|-------|
| PH-2                                | 0 (0.0%) | 4 (8.9%)   |       |
| Subarachnoid hemorrhage             | 0 (0.0%) | 2 (4.4%)   |       |
| Symptomatic intracranial hemorrhage | 0 (0.0%) | 13 (38.2%) | 0.006 |

Values are means ± SDs, or medians (with quartiles), as appropriate.

Abbreviations: NIHSS = National Institutes of Health Stroke Scale; ERT = endovascular reperfusion therapy; mTICI = modified treatment in cerebral ischemia; HI = hemorrhagic infarction; PH = parenchymal hematoma

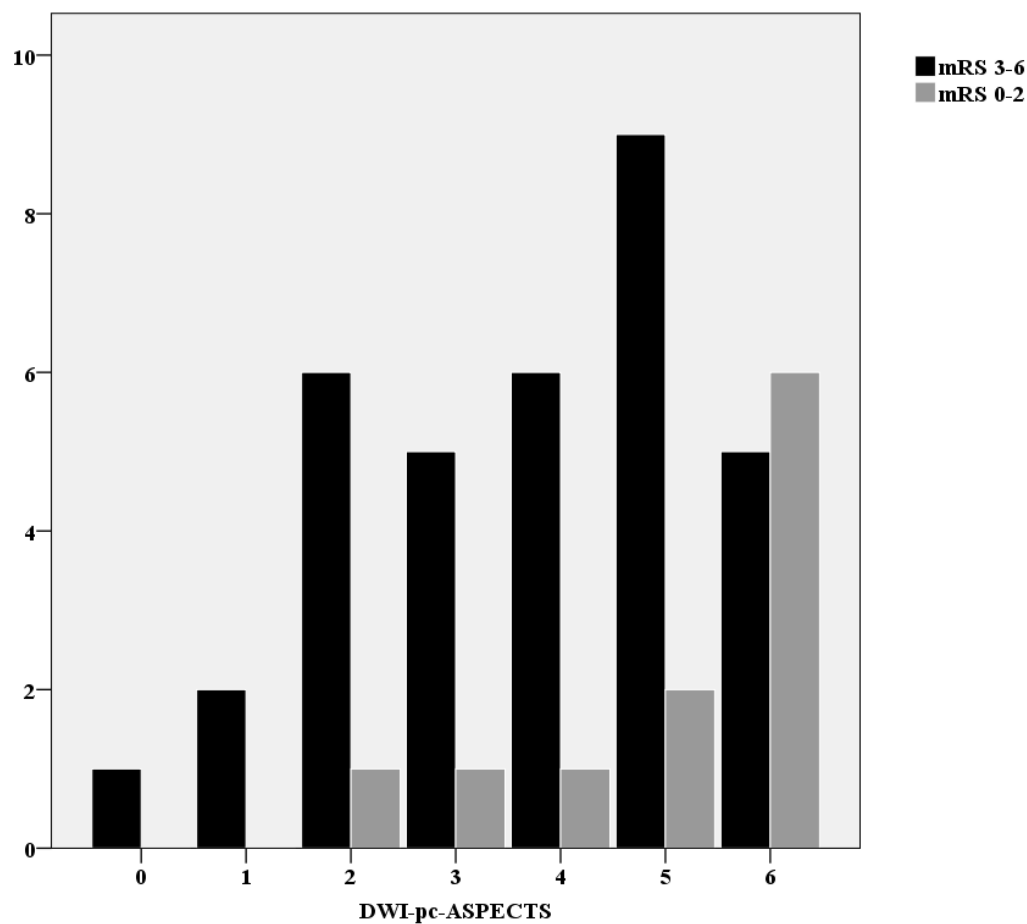

**Supplementary Figure 1. Clinical outcome of 45 acute basilar artery occlusion patients with diffusion weighted imaging-posterior circulation-Acute Stroke Prognosis Early CT Score (DWI-pc-ASPECT) less than 6. The proportion of outcomes (modified Rankin Scale, 0–2 vs 3–6) within each DWI-pc-ASPECTS group is shown.**

**Abbreviation: mRS=modified Rankin scale**
